# Supplementary material for: Structural Requirements of Alkylglyceryl-l-Ascorbic Acid Derivatives for Melanogenesis Inhibitory Activity
Source: PubMed Central journal article supplement (PMC5979531; doi:10.3390/ijms19041144), 2018-04-10
Supplement: ijms-19-01144-s001.pdf [file ijms-19-01144-s001.pdf]

# Supplementary Materials: Structural Requirements of Alkylglyceryl-L-Ascorbic Acid Derivatives for Melanogenesis Inhibitory Activity

Norihisa Taira \*, Yushi Katsuyama , Masato Yoshioka , Osamu Muraoka , and Toshio Morikawa

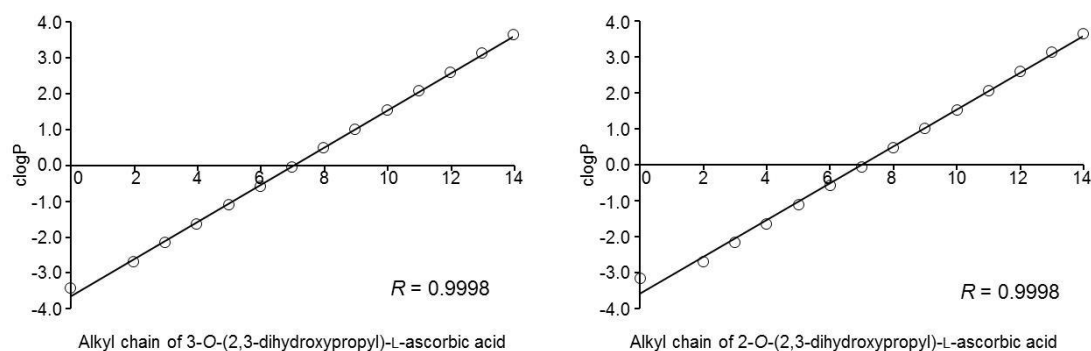

**Figure S1.** Correlations between  $clogP$  values and length of the alkyl chain in 2-O-alkyl-3-O-(2,3-dihydroxypropyl)-L-ascorbic acids (**2–14**) and 3-O-alkyl-2-O-(2,3-dihydroxypropyl)-L-ascorbic acids (**16–28**).  $clogP$  Values were calculated by ChemDraw Ultra ver. 7.0.1 software (PerkinElmer Inc., Waltham, MA, USA).
